# Supplementary material for: Identification of Renal Transplantation Rejection Biomarkers in Blood Using the Systems Biology Approach
Source: PubMed Central journal article supplement (PMC10826908; doi:10.52547/ibj.3871), 2023-08-23
Supplement: ibj-27-375-s001.pdf [file ibj-27-375-s001.pdf]

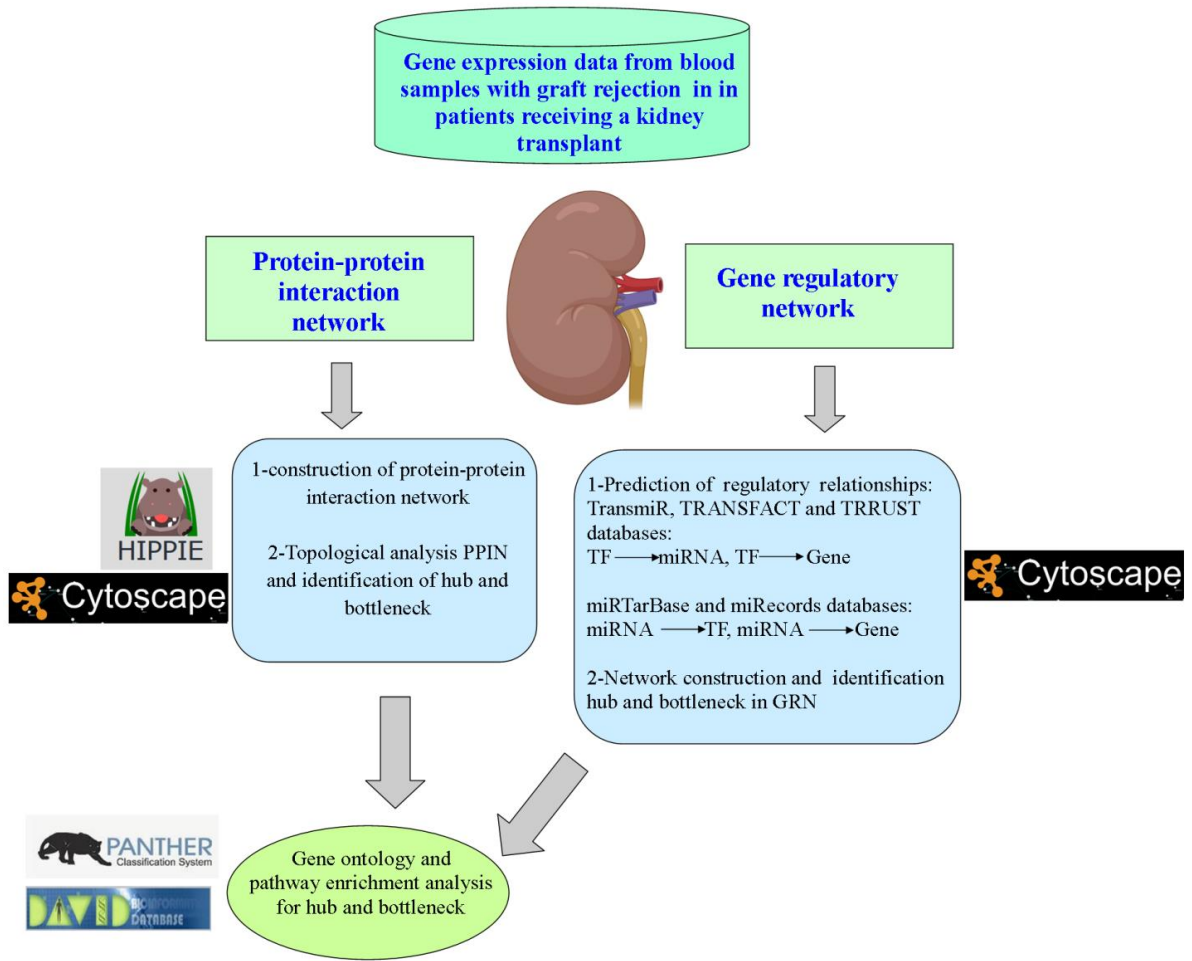

**Supplementary Fig. 1.** Workflow of the study.

**Supplementary Table 1.** Results of shared up- and downregulated genes between GSEs obtained by Venn diagram

| Shared upregulated genes                 | Shared downregulated genes |
|------------------------------------------|----------------------------|
| <i>SLC8A1-AS1</i>                        | <i>PRKRA</i>               |
| <i>H3F3A</i>                             | <i>SIGLEC17P</i>           |
| <i>SQSTM1</i>                            | <i>PTGDR</i>               |
| <i>DMXL2</i>                             | <i>ZBTB38</i>              |
| <i>NLN</i>                               | <i>HNRNPR</i>              |
| <i>MKNK1</i>                             | <i>CAMK2D</i>              |
| <i>CDK13</i>                             | <i>RICTOR</i>              |
| <i>N4BP2L2</i>                           | <i>DAPPI</i>               |
| <i>C9orf84</i>                           | <i>ARLAC</i>               |
| <i>GBP1</i>                              | <i>PSMF1</i>               |
| <i>PGGHG</i>                             | <i>GUCY1B3</i>             |
| <i>DLGAP4</i>                            | <i>PITHD1</i>              |
| <i>ZNF721</i>                            | <i>PTGS2</i>               |
| <i>BRD8</i>                              | <i>TOX</i>                 |
| <i>HP</i>                                | <i>LTN1</i>                |
| <i>LOC100289333</i>                      | <i>KLF12</i>               |
| <i>CDC42SE1</i>                          | <i>PRF1</i>                |
| <i>LYST</i>                              | <i>STYX</i>                |
| <i>LMO2</i>                              | <i>MARCH</i>               |
| <i>UPP1</i>                              | <i>MFAP3L</i>              |
| <i>VPS9D1</i>                            | <i>JAZF1</i>               |
| <i>MALAT1</i>                            | <i>FAM104A</i>             |
| <i>IRAK3</i>                             | <i>KLRF1</i>               |
| <i>LINC01000</i>                         | <i>ND2</i>                 |
| <i>CIQA</i>                              | <i>RORA</i>                |
| <i>CEACAM1</i>                           | <i>SSBP3</i>               |
| <i>ARHGAP26</i>                          | <i>FBXO9</i>               |
| <i>WSB1</i>                              | <i>CLINT1</i>              |
| <i>BCAT1</i>                             | <i>DCUN1D1</i>             |
| <i>DOCK4</i>                             | <i>TPGS2</i>               |
| <i>MCMBP</i>                             | <i>SYNCRIP</i>             |
| <i>TMEFF2</i>                            | <i>CPA3</i>                |
| <i>ALPK1</i>                             | <i>KLRC2//KLRC1</i>        |
| <i>LOC101928673</i>                      | <i>SYTL2</i>               |
| <i>SLC11A1</i>                           | <i>FGFR1OP2</i>            |
| <i>LRRFIP1</i>                           | <i>P2RY10</i>              |
| <i>GRAMD1A</i>                           | <i>HTATSF1</i>             |
| <i>LOC101060275//NPIPA5//NPIP5//</i>     |                            |
| <i>NPIPB11//LOC613037//NPIPB4//NPIP3</i> | <i>SLC25A36</i>            |
|                                          | <i>FGFBP2</i>              |
|                                          | <i>TGFBP3</i>              |
|                                          | <i>JAK1</i>                |
|                                          | <i>CXCL5</i>               |
|                                          | <i>FAXDC2</i>              |
|                                          | <i>KLRC4-KLRK1//KLRK1</i>  |
|                                          | <i>NOV</i>                 |
|                                          | <i>RAD21</i>               |
|                                          | <i>VPS13C</i>              |
|                                          | <i>USP28</i>               |
|                                          | <i>PXK</i>                 |
|                                          | <i>IL2RB</i>               |
|                                          | <i>XPO7</i>                |
|                                          | <i>TMEM106B</i>            |
|                                          | <i>KLRD1</i>               |
|                                          | <i>ACTR2</i>               |
|                                          | <i>HOPX</i>                |
|                                          | <i>ZNF652</i>              |

**Supplementary Table 2.** Results of topological analysis of PPIN and shared genes

| <b>10% degree</b>         | <b>10% betweenness centrality</b> | <b>10% closeness centrality</b> | <b>Shared genes (10% degree-10% betweenness centrality-10% closeness centrality)</b> |
|---------------------------|-----------------------------------|---------------------------------|--------------------------------------------------------------------------------------|
| <i>SYNCRIP</i>            | <i>GRAMD1A</i>                    | <i>GRAMD1A</i>                  | <i>MTOR</i>                                                                          |
| <i>SQSTM1</i>             | <i>FAM104A</i>                    | <i>FAM104A</i>                  | <i>ARRB2</i>                                                                         |
| <i>ACTR2</i>              | <i>ND2</i>                        | <i>ND2</i>                      | <i>HNRNPR</i>                                                                        |
| <i>JAK1</i>               | <i>TPGS2</i>                      | <i>TPGS2</i>                    | <i>MAPK14</i>                                                                        |
| <i>H3F3A, H3F3B</i>       | <i>SYNCRIP</i>                    | <i>CDC42SE1</i>                 | <i>VCAM1</i>                                                                         |
| <i>RICTOR</i>             | <i>SQSTM1</i>                     | <i>CDC42</i>                    | <i>TP53</i>                                                                          |
| <i>CLINT1</i>             | <i>ACTR2</i>                      | <i>KLF12</i>                    | <i>PRKRA</i>                                                                         |
| <i>FGFR1OP2</i>           | <i>RICTOR</i>                     | <i>CTBP1</i>                    | <i>INSR</i>                                                                          |
| <i>RAD21</i>              | <i>JAK1</i>                       | <i>SLC25A36</i>                 | <i>ND2</i>                                                                           |
| <i>LTN1</i>               | <i>CLINT1</i>                     | <i>PTN</i>                      | <i>IKBKG</i>                                                                         |
| <i>CDK13</i>              | <i>LTN1</i>                       | <i>PITHD1</i>                   | <i>SYNCRIP</i>                                                                       |
| <i>HNRNPR</i>             | <i>H3F3A, H3F3B</i>               | <i>FNTB</i>                     | <i>RICTOR</i>                                                                        |
| <i>PSMF1</i>              | <i>FGFR1OP2</i>                   | <i>PGGHG</i>                    | <i>CAMK2D</i>                                                                        |
| <i>LMO2</i>               | <i>SUMO2</i>                      | <i>PAXIP1</i>                   | <i>PRKCZ</i>                                                                         |
| <i>MCMBP</i>              | <i>HNRNPR</i>                     | <i>VCP</i>                      | <i>USP28</i>                                                                         |
| <i>BRD8</i>               | <i>CDK13</i>                      | <i>SRC</i>                      | <i>MARCH</i>                                                                         |
| <i>MKNK1</i>              | <i>MTOR</i>                       | <i>UBXN2B</i>                   | <i>KEAP1</i>                                                                         |
| <i>PTGS2</i>              | <i>RAD21</i>                      | <i>EWSR1</i>                    | <i>ICE2</i>                                                                          |
| <i>PRKRA</i>              | <i>LMO2</i>                       | <i>TLL1</i>                     | <i>JAK1</i>                                                                          |
| <i>DCUN1D1</i>            | <i>MKNK1</i>                      | <i>C11orf49</i>                 | <i>SUMO2</i>                                                                         |
| <i>CAMK2D</i>             | <i>TIRAP</i>                      | <i>UBXN6</i>                    | <i>SQSTM1</i>                                                                        |
| <i>ZBTB38</i>             | <i>BRD8</i>                       | <i>NDUFA11</i>                  | <i>FAM104A</i>                                                                       |
| <i>XPO7</i>               | <i>CAMK2D</i>                     | <i>TIMMDC1</i>                  | <i>BRD8</i>                                                                          |
| <i>HTATSF1</i>            | <i>SNW1</i>                       | <i>GABRE</i>                    | <i>PTPN11</i>                                                                        |
| <i>TGFBR3</i>             | <i>IKBKG</i>                      | <i>MCOLN3</i>                   | <i>EGLN3</i>                                                                         |
| <i>MARCH</i>              | <i>PSMF1</i>                      | <i>ACVR1</i>                    | <i>MAPT</i>                                                                          |
| <i>NLN</i>                | <i>MAPK14</i>                     | <i>GRAMD2B</i>                  | <i>TARDBP</i>                                                                        |
| <i>USP28</i>              | <i>MCMBP</i>                      | <i>TMEM30A</i>                  | <i>GRAMD1A</i>                                                                       |
| <i>SSBP3</i>              | <i>UBE2D2</i>                     | <i>SYNCRIP</i>                  | <i>SNW1</i>                                                                          |
| <i>CIQA</i>               | <i>ICE2</i>                       | <i>SQSTM1</i>                   | <i>RIPK4</i>                                                                         |
| <i>CEACAM1</i>            | <i>MAPT</i>                       | <i>MTOR</i>                     | <i>CDK13</i>                                                                         |
| <i>LOC100290651, STYX</i> | <i>TOP1</i>                       | <i>HNRNPR</i>                   | <i>ACTR2</i>                                                                         |
| <i>DLGAP4</i>             | <i>TARDBP</i>                     | <i>TARDBP</i>                   | <i>TPGS2</i>                                                                         |
| <i>HP</i>                 | <i>PHC2</i>                       | <i>MAPT</i>                     | <i>GRB2</i>                                                                          |
| <i>SUMO2</i>              | <i>SEM1</i>                       | <i>SUMO2</i>                    |                                                                                      |
| <i>RORA</i>               | <i>DCUN1D1</i>                    | <i>RICTOR</i>                   |                                                                                      |
| <i>ARHGAP26</i>           | <i>XPO7</i>                       | <i>TP53</i>                     |                                                                                      |
| <i>DMXL2</i>              | <i>PTGS2</i>                      | <i>SNW1</i>                     |                                                                                      |
| <i>WSB1</i>               | <i>PRKRA</i>                      | <i>PRKRA</i>                    |                                                                                      |
| <i>GRAMD1A</i>            | <i>KEAP1</i>                      | <i>JAK1</i>                     |                                                                                      |
| <i>FBXO9</i>              | <i>TP53</i>                       | <i>PTPN11</i>                   |                                                                                      |
| <i>SYTL2</i>              | <i>ARRB2</i>                      | <i>GRB2</i>                     |                                                                                      |
| <i>TP53</i>               | <i>ZBTB38</i>                     | <i>TNFRSF1A</i>                 |                                                                                      |
| <i>LRRFIP1</i>            | <i>STK24</i>                      | <i>VCAM1</i>                    |                                                                                      |
| <i>IRAK3</i>              | <i>HTATSF1</i>                    | <i>KEAP1</i>                    |                                                                                      |
| <i>IKBKG</i>              | <i>PARD6B</i>                     | <i>CDK13</i>                    |                                                                                      |
| <i>DOCK4</i>              | <i>DYNLL1</i>                     | <i>IKBKG</i>                    |                                                                                      |
| <i>N4BP2L2</i>            | <i>MARCH</i>                      | <i>MAPK14</i>                   |                                                                                      |
| <i>VPS13C</i>             | <i>INSR</i>                       | <i>CTN</i>                      |                                                                                      |
| <i>SNW1</i>               | <i>TGFBR3</i>                     | <i>ECHS1</i>                    |                                                                                      |
| <i>PXK</i>                | <i>PTPN11</i>                     | <i>CAMK2D</i>                   |                                                                                      |
| <i>ARRB2</i>              | <i>MBOAT1</i>                     | <i>INSR</i>                     |                                                                                      |
| <i>CUL1</i>               | <i>GRB2</i>                       | <i>ICE2</i>                     |                                                                                      |
| <i>SKP1</i>               | <i>EHMT2</i>                      | <i>ARRB2</i>                    |                                                                                      |
| <i>MAPK14</i>             | <i>NLN</i>                        | <i>PRKCZ</i>                    |                                                                                      |
| <i>KEAP1</i>              | <i>CLTC</i>                       | <i>RIPK4</i>                    |                                                                                      |
| <i>MTOR</i>               | <i>USP28</i>                      | <i>STK24</i>                    |                                                                                      |
| <i>PTPN11</i>             | <i>VCAM1</i>                      | <i>CDK2</i>                     |                                                                                      |
| <i>GRB2</i>               | <i>TGFBR2</i>                     | <i>ACTR2</i>                    |                                                                                      |
| <i>EP300</i>              | <i>ARRB1</i>                      | <i>BRD8</i>                     |                                                                                      |
| <i>HNRNPA1</i>            | <i>PRKCZ</i>                      | <i>MYC</i>                      |                                                                                      |
| <i>TGFBR2</i>             | <i>PPP2CA</i>                     | <i>EGLN3</i>                    |                                                                                      |
| <i>EGLN3</i>              | <i>DLGAP4</i>                     | <i>ILF2</i>                     |                                                                                      |
| <i>JAZF1</i>              | <i>TNFRSF1A</i>                   | <i>RPTOR</i>                    |                                                                                      |
| <i>FAM104A</i>            | <i>EGLN3</i>                      | <i>MAP1LC3A</i>                 |                                                                                      |
| <i>VCAM1</i>              | <i>LOC100290651, STYX</i>         | <i>MAP1LC3B</i>                 |                                                                                      |
| <i>MAPT</i>               | <i>CDK2</i>                       | <i>GABARAPL1</i>                |                                                                                      |

| <b>10% degree centrality</b> | <b>10% betweenness centrality</b> | <b>10% closeness centrality</b> | <b>Shared genes (10% degree-10% betweenness centrality-10% closeness centrality)</b> |
|------------------------------|-----------------------------------|---------------------------------|--------------------------------------------------------------------------------------|
| <i>TARDBP</i>                | <i>RXRA</i>                       | <i>USP28</i>                    |                                                                                      |
| <i>ND2</i>                   | <i>MAP1LC3A</i>                   | <i>HNRNPA1</i>                  |                                                                                      |
| <i>INSR</i>                  | <i>MAP1LC3B</i>                   | <i>RXRA</i>                     |                                                                                      |
| <i>MYC</i>                   | <i>GABARAPL1</i>                  | <i>CDC37</i>                    |                                                                                      |
| <i>TIRAP</i>                 | <i>RIPK4</i>                      | <i>PRMT1</i>                    |                                                                                      |
| <i>ILF2</i>                  | <i>CIQA</i>                       | <i>SMN1, SMN2</i>               |                                                                                      |
| <i>ICE2</i>                  | <i>STAT1</i>                      | <i>YBX1</i>                     |                                                                                      |
| <i>HOPX</i>                  | <i>HP</i>                         | <i>HNRNPU</i>                   |                                                                                      |
| <i>TPGS2</i>                 | <i>SRPK1</i>                      | <i>LARP7</i>                    |                                                                                      |
| <i>PAR6B</i>                 | <i>CTTN</i>                       | <i>MEPCE</i>                    |                                                                                      |
| <i>DBN1</i>                  | <i>FBXW7</i>                      | <i>H2AFX</i>                    |                                                                                      |
| <i>RIPK4</i>                 | <i>CCT3</i>                       | <i>SNRNP70</i>                  |                                                                                      |
| <i>CDC5L</i>                 | <i>ECHS1</i>                      | <i>CNBP</i>                     |                                                                                      |
| <i>IQGAP1</i>                | <i>FN1</i>                        | <i>U2AF2</i>                    |                                                                                      |
| <i>CUL3</i>                  | <i>CDC5L</i>                      | <i>CDK9</i>                     |                                                                                      |
| <i>PRKCZ</i>                 | <i>SKP1</i>                       | <i>PHC2</i>                     |                                                                                      |
| <i>CUL5</i>                  | <i>SSBP3</i>                      | <i>MARCH</i>                    |                                                                                      |
| <i>MAPK1</i>                 | <i>ARHGAP26</i>                   | <i>DICER1</i>                   |                                                                                      |

**Supplementary Table 3.** Results of topological analysis of upregulated genes in GRN and shared genes

| <b>5% degree</b> | <b>5% betweenness centrality</b> | <b>5% closeness centrality</b> | <b>Shared genes (5% degree-5% betweenness centrality-5% closeness centrality)</b> |
|------------------|----------------------------------|--------------------------------|-----------------------------------------------------------------------------------|
| <i>MALAT1</i>    | <i>MALAT1</i>                    | <i>MALAT1</i>                  | <i>VDR</i>                                                                        |
| <i>NFIC</i>      | <i>TP53</i>                      | <i>TP53</i>                    | <i>miR-204</i>                                                                    |
| <i>GATA6</i>     | <i>POU2F1</i>                    | <i>POU2F1</i>                  | <i>TP53</i>                                                                       |
| <i>TP53</i>      | <i>NFIC</i>                      | <i>miR-204</i>                 | <i>CRTC3</i>                                                                      |
| <i>YY1</i>       | <i>miR-204</i>                   | <i>miR-200a</i>                | <i>RARA</i>                                                                       |
| <i>SP1</i>       | <i>NR3C1</i>                     | <i>miR-200b</i>                | <i>LYST</i>                                                                       |
| <i>ZBTB7A</i>    | <i>FOXC1</i>                     | <i>NR3C1</i>                   | <i>PCBP1</i>                                                                      |
| <i>REL</i>       | <i>GATA6</i>                     | <i>CEBPB</i>                   | <i>miR-200a</i>                                                                   |
| <i>POU2F1</i>    | <i>BCAT1</i>                     | <i>BCAT1</i>                   | <i>NFIA</i>                                                                       |
| <i>HIF1A</i>     | <i>miR-9</i>                     | <i>miR-200c</i>                | <i>CACYBP</i>                                                                     |
| <i>STAT3</i>     | <i>miR-200b</i>                  | <i>miR-141</i>                 | <i>GATA2</i>                                                                      |
| <i>WSB1</i>      | <i>YY1</i>                       | <i>AHR</i>                     | <i>UPP1</i>                                                                       |
| <i>CREB1</i>     | <i>SP1</i>                       | <i>SMAD3</i>                   | <i>SQSTM1</i>                                                                     |
| <i>KLF13</i>     | <i>AHR</i>                       | <i>THRA</i>                    | <i>miR-9</i>                                                                      |
| <i>FOXC1</i>     | <i>miR-200a</i>                  | <i>miR-9</i>                   | <i>SMAD3</i>                                                                      |
| <i>SMAD4</i>     | <i>GATA2</i>                     | <i>SREBF1</i>                  | <i>MALAT1</i>                                                                     |
| <i>ELK4</i>      | <i>THRA</i>                      | <i>EZH2</i>                    | <i>EZH2</i>                                                                       |
| <i>NR3C1</i>     | <i>SQSTM1</i>                    | <i>SQSTM1</i>                  | <i>miR-146b</i>                                                                   |
| <i>E2F1</i>      | <i>REL</i>                       | <i>TGFB1</i>                   | <i>miR-429</i>                                                                    |
| <i>ESR1</i>      | <i>CEBPB</i>                     | <i>VDR</i>                     | <i>miR-200b</i>                                                                   |
| <i>SRF</i>       | <i>SREBF1</i>                    | <i>PPARG</i>                   | <i>FOXC1</i>                                                                      |
| <i>SPIB</i>      | <i>VDR</i>                       | <i>LRRFIP1</i>                 | <i>SREBF1</i>                                                                     |
| <i>MAPK14</i>    | <i>miR-200c</i>                  | <i>NFIA</i>                    | <i>POU2F1</i>                                                                     |
| <i>ZFH3</i>      | <i>miR-202</i>                   | <i>miR-429</i>                 | <i>BCAT1</i>                                                                      |
| <i>RELA</i>      | <i>miR-141</i>                   | <i>PRDM1</i>                   | <i>MEF2A</i>                                                                      |
| <i>PURA</i>      | <i>WSB1</i>                      | <i>TCF4</i>                    | <i>TGFB1</i>                                                                      |
| <i>RUNX1</i>     | <i>LRRFIP1</i>                   | <i>RARA</i>                    | <i>CEBPB</i>                                                                      |
| <i>UBTF</i>      | <i>HIF1A</i>                     | <i>miR-146b</i>                | <i>SND1</i>                                                                       |
| <i>ZNF281</i>    | <i>miR-146b</i>                  | <i>miR-22</i>                  | <i>TMEFF2</i>                                                                     |
| <i>E2F6</i>      | <i>ZBTB7A</i>                    | <i>MEF2A</i>                   | <i>ETS2</i>                                                                       |
| <i>SP2</i>       | <i>UPP1</i>                      | <i>FOXC1</i>                   | <i>miR-200c</i>                                                                   |
| <i>BCAT1</i>     | <i>FOXC1</i>                     | <i>miR-202</i>                 | <i>PPARG</i>                                                                      |
| <i>AHR</i>       | <i>STAT3</i>                     | <i>ETS2</i>                    | <i>miR-22</i>                                                                     |
| <i>WT1</i>       | <i>miR-21</i>                    | <i>SND1</i>                    | <i>LRRFIP1</i>                                                                    |
| <i>THRA</i>      | <i>KLF13</i>                     | <i>CRTC3</i>                   | <i>TCF4</i>                                                                       |
| <i>TFAP2A</i>    | <i>ZNF281</i>                    | <i>PCBP1</i>                   | <i>PRDM1</i>                                                                      |
| <i>NFKB1</i>     | <i>MAPK14</i>                    | <i>miR-375</i>                 | <i>AHR</i>                                                                        |
| <i>ETS1</i>      | <i>SRF</i>                       | <i>GATA2</i>                   | <i>miR-141</i>                                                                    |
| <i>REPIN1</i>    | <i>RARA</i>                      | <i>TMEFF2</i>                  | <i>NR3C1</i>                                                                      |
| <i>CEBPB</i>     | <i>RELA</i>                      | <i>BCL6</i>                    | <i>THRA</i>                                                                       |
| <i>NLN</i>       | <i>PCBP1</i>                     | <i>LYST</i>                    |                                                                                   |
| <i>MYC</i>       | <i>ELK4</i>                      | <i>DNMT1</i>                   |                                                                                   |
| <i>miR-155</i>   | <i>CREB1</i>                     | <i>HDAC2</i>                   |                                                                                   |
| <i>SQSTM1</i>    | <i>miR-22</i>                    | <i>CACYBP</i>                  |                                                                                   |
| <i>HNF4A</i>     | <i>E2F6</i>                      | <i>E2F7</i>                    |                                                                                   |
| <i>IRAK3</i>     | <i>NLN</i>                       | <i>SP3</i>                     |                                                                                   |
| <i>ELK1</i>      | <i>miR-429</i>                   | <i>ATF4</i>                    |                                                                                   |
| <i>miR-21</i>    | <i>CDC42SE1</i>                  | <i>IL6</i>                     |                                                                                   |
| <i>VDR</i>       | <i>miR-155</i>                   | <i>PPARA</i>                   |                                                                                   |
| <i>DLGAP4</i>    | <i>THRB</i>                      | <i>BMP4</i>                    |                                                                                   |
| <i>JUN</i>       | <i>ETS2</i>                      | <i>BM11</i>                    |                                                                                   |
| <i>CDC42SE1</i>  | <i>CRTC3</i>                     | <i>AKT1</i>                    |                                                                                   |
| <i>FOS</i>       | <i>RUNX1</i>                     | <i>KLF3</i>                    |                                                                                   |
| <i>miR-17</i>    | <i>ELK1</i>                      | <i>NFATC3</i>                  |                                                                                   |
| <i>miR-20a</i>   | <i>SMAD4</i>                     | <i>EP300</i>                   |                                                                                   |
| <i>SREBF1</i>    | <i>REPIN1</i>                    | <i>IRF3</i>                    |                                                                                   |
| <i>LRRFIP1</i>   | <i>ZFH3</i>                      | <i>IL1B</i>                    |                                                                                   |
| <i>N4BP2L2</i>   | <i>miR-23c</i>                   | <i>lincMTX2</i>                |                                                                                   |
| <i>miR-200c</i>  | <i>TGFB1</i>                     | <i>UPP1</i>                    |                                                                                   |
| <i>APEX1</i>     | <i>SMAD3</i>                     | <i>TEAD2</i>                   |                                                                                   |
| <i>ZNF148</i>    | <i>NFIA</i>                      | <i>CDKN1A</i>                  |                                                                                   |
| <i>THRB</i>      | <i>SPIB</i>                      | <i>NR2F1</i>                   |                                                                                   |
| <i>SNAI2</i>     | <i>SND1</i>                      | <i>BRD4</i>                    |                                                                                   |
| <i>miR-200b</i>  | <i>E2F1</i>                      | <i>JMJD1C</i>                  |                                                                                   |
| <i>NR1H2</i>     | <i>ETS1</i>                      | <i>SMAD1</i>                   |                                                                                   |
| <i>miR-19a</i>   | <i>IRAK3</i>                     | <i>EMSY</i>                    |                                                                                   |

| <b>5% degree</b> | <b>5% betweenness centrality</b> | <b>5% closeness centrality</b> | <b>Shared genes (5% degree-5% betweenness centrality-5% closeness centrality)</b> |
|------------------|----------------------------------|--------------------------------|-----------------------------------------------------------------------------------|
| <i>POU2F2</i>    | <i>PRDM1</i>                     | <i>FOXM1</i>                   |                                                                                   |
| <i>MTF1</i>      | <i>lincMTX2</i>                  | <i>PELP1</i>                   |                                                                                   |
| <i>EGR1</i>      | <i>TMEFF2</i>                    | <i>AKT2</i>                    |                                                                                   |
| <i>H3F3A</i>     | <i>EZH2</i>                      | <i>EHMT2</i>                   |                                                                                   |
| <i>miR-145</i>   | <i>miR-20a</i>                   | <i>SIX1</i>                    |                                                                                   |
| <i>RARA</i>      | <i>miR-17</i>                    | <i>miR-23c</i>                 |                                                                                   |
| <i>ZBTB16</i>    | <i>HNF4A</i>                     | <i>CDKN2A</i>                  |                                                                                   |
| <i>miR-27a</i>   | <i>miR-375</i>                   | <i>lincFOXF1</i>               |                                                                                   |
| <i>miR-200a</i>  | <i>ESR1</i>                      | <i>PBX2</i>                    |                                                                                   |
| <i>TCF3</i>      | <i>miR-93</i>                    | <i>HEY1</i>                    |                                                                                   |
| <i>miR-34a</i>   | <i>JUN</i>                       | <i>ITGB3</i>                   |                                                                                   |
| <i>miR-18a</i>   | <i>NFKB1</i>                     | <i>PLK1</i>                    |                                                                                   |
| <i>miR-93</i>    | <i>miR-145</i>                   | <i>miR-1297</i>                |                                                                                   |
| <i>SREBF2</i>    | <i>UBTF</i>                      | <i>PCGF2</i>                   |                                                                                   |
| <i>HINFP</i>     | <i>ZNF148</i>                    | <i>DDIT3</i>                   |                                                                                   |
| <i>miR-141</i>   | <i>TCF4</i>                      | <i>GAS5</i>                    |                                                                                   |
| <i>UPP1</i>      | <i>CDK13</i>                     | <i>MTA1</i>                    |                                                                                   |
| <i>MYCN</i>      | <i>PPARG</i>                     | <i>BCLAF1</i>                  |                                                                                   |
| <i>KLF4</i>      | <i>CACYBP</i>                    | <i>HDAC9</i>                   |                                                                                   |
| <i>SOX9</i>      | <i>FOS</i>                       | <i>ATF3</i>                    |                                                                                   |
| <i>miR-146a</i>  | <i>H3F3A</i>                     | <i>HPS1</i>                    |                                                                                   |
| <i>CDK13</i>     | <i>miR-122</i>                   | <i>LOC100133286</i>            |                                                                                   |
| <i>NFYA</i>      | <i>miR-124</i>                   | <i>LOC100132942</i>            |                                                                                   |
| <i>miR-143</i>   | <i>PURA</i>                      | <i>LOC100132834</i>            |                                                                                   |
| <i>miR-124</i>   | <i>DLGAP4</i>                    | <i>LOC100132474</i>            |                                                                                   |
| <i>miR-106b</i>  | <i>MTF1</i>                      | <i>NBPF10</i>                  |                                                                                   |
| <i>MCMBP</i>     | <i>miR-143</i>                   | <i>GPS2P2</i>                  |                                                                                   |
| <i>miR-429</i>   | <i>LMO2</i>                      | <i>LOC100131910</i>            |                                                                                   |
| <i>FOXL1</i>     | <i>LYST</i>                      | <i>LOC100131821</i>            |                                                                                   |
| <i>HOXA5</i>     | <i>ARHGAP26</i>                  | <i>LOC100131540</i>            |                                                                                   |
| <i>SAMD9L</i>    | <i>miR-223</i>                   | <i>LOC100131195</i>            |                                                                                   |
| <i>GRAMD1A</i>   | <i>WT1</i>                       | <i>LOC100131150</i>            |                                                                                   |
| <i>PCBP1</i>     | <i>TFAP2A</i>                    | <i>LOC100131053</i>            |                                                                                   |
| <i>SNAI1</i>     | <i>MCMBP</i>                     | <i>LOC100130876</i>            |                                                                                   |
| <i>IRF1</i>      | <i>MEF2A</i>                     | <i>LOC100130856</i>            |                                                                                   |
| <i>miR-221</i>   | <i>N4BP2L2</i>                   | <i>LOC100130542</i>            |                                                                                   |
| <i>LMO2</i>      | <i>miR-31</i>                    | <i>LOC100130468</i>            |                                                                                   |
| <i>MYB</i>       | <i>lincFOXF1</i>                 | <i>LOC100129974</i>            |                                                                                   |
| <i>RUNX2</i>     | <i>miR-146a</i>                  | <i>NAG20</i>                   |                                                                                   |
| <i>HOXD9</i>     | <i>POU2F2</i>                    | <i>LOC100129380</i>            |                                                                                   |
| <i>ARHGAP26</i>  | <i>CEBPD</i>                     | <i>LOC100129363</i>            |                                                                                   |
| <i>ETS2</i>      | <i>miR-221</i>                   | <i>LOC100129322</i>            |                                                                                   |
| <i>FOXA1</i>     | <i>miR-27a</i>                   | <i>LOC100129312</i>            |                                                                                   |
| <i>BRCA1</i>     | <i>miR-18a</i>                   | <i>RPL22P24</i>                |                                                                                   |
| <i>SPI1</i>      | <i>miR-29a</i>                   | <i>LOC100129280</i>            |                                                                                   |
| <i>miR-20b</i>   | <i>miR-34a</i>                   | <i>LOC100129233</i>            |                                                                                   |
| <i>RXRA</i>      | <i>GRAMD1A</i>                   | <i>LOC100129171</i>            |                                                                                   |
| <i>miR-150</i>   | <i>SP2</i>                       | <i>LOC100129118</i>            |                                                                                   |
| <i>miR-106a</i>  | <i>miR-106b</i>                  | <i>LOC100129069</i>            |                                                                                   |
| <i>miR-182</i>   | <i>TCF3</i>                      | <i>LOC100129042</i>            |                                                                                   |
| <i>miR-29a</i>   | <i>BCL6</i>                      | <i>LOC100128343</i>            |                                                                                   |
| <i>PRDM1</i>     | <i>miR-19a</i>                   | <i>LOC100128325</i>            |                                                                                   |
| <i>SND1</i>      | <i>let-7b</i>                    | <i>LOC100128088</i>            |                                                                                   |
| <i>IRF2</i>      | <i>RAD51-AS1</i>                 | <i>LOC100125918</i>            |                                                                                   |
| <i>miR-92a</i>   | <i>GAS5</i>                      | <i>LOC730139</i>               |                                                                                   |
| <i>SLC11A1</i>   | <i>CEACAM1</i>                   | <i>MOSMO</i>                   |                                                                                   |
| <i>miR-16</i>    | <i>miR-142</i>                   | <i>LOC729696</i>               |                                                                                   |
| <i>CEACAM1</i>   | <i>MYC</i>                       | <i>ZNF812P</i>                 |                                                                                   |
| <i>CEBPD</i>     | <i>miR-222</i>                   | <i>ANKDD1B</i>                 |                                                                                   |
| <i>EZH2</i>      | <i>miR-1</i>                     | <i>LOC728543</i>               |                                                                                   |
| <i>NFIA</i>      | <i>miR-16</i>                    | <i>SNORD89</i>                 |                                                                                   |
| <i>TGFB1</i>     | <i>SLC11A1</i>                   | <i>SCARNA10</i>                |                                                                                   |
| <i>CRTC3</i>     | <i>NORAD</i>                     | <i>SNORD23</i>                 |                                                                                   |
| <i>CBFB</i>      | <i>ZBTB16</i>                    | <i>SNORD6</i>                  |                                                                                   |
| <i>miR-23a</i>   | <i>SNAI2</i>                     | <i>SNORA16A</i>                |                                                                                   |
| <i>let-7b</i>    | <i>HP</i>                        | <i>SNORD5</i>                  |                                                                                   |
| <i>miR-31</i>    | <i>SAMD9L</i>                    | <i>SNORA32</i>                 |                                                                                   |
| <i>TMEFF2</i>    | <i>APEX1</i>                     | <i>SNORA25</i>                 |                                                                                   |

| <b>5% degree</b> | <b>5% betweenness centrality</b> | <b>5% closeness centrality</b> | <b>Shared genes (5% degree-5% betweenness centrality-5% closeness centrality)</b> |
|------------------|----------------------------------|--------------------------------|-----------------------------------------------------------------------------------|
| <i>SMAD3</i>     | <i>GBP1</i>                      | <i>SNORA61</i>                 |                                                                                   |
| <i>miR-19b</i>   | <i>miR-192</i>                   | <i>SNORA44</i>                 |                                                                                   |
| <i>TP63</i>      | <i>DNMT1</i>                     | <i>SNORA80E</i>                |                                                                                   |
| <i>let-7a</i>    | <i>RXRA</i>                      | <i>SNORA40</i>                 |                                                                                   |
| <i>miR-15a</i>   | <i>miR-182</i>                   | <i>SNORA2C</i>                 |                                                                                   |
| <i>miR-1</i>     | <i>miR-15a</i>                   | <i>SNORA30</i>                 |                                                                                   |
| <i>miR-223</i>   | <i>ATF4</i>                      | <i>SNORA28</i>                 |                                                                                   |
| <i>miR-92a-1</i> | <i>miR-214</i>                   | <i>SNORA18</i>                 |                                                                                   |
| <i>JUND</i>      | <i>let-7a</i>                    | <i>SNORA2A</i>                 |                                                                                   |
| <i>miR-183</i>   | <i>CRTC1</i>                     | <i>SNORA1</i>                  |                                                                                   |
| <i>miR-302b</i>  | <i>lnrCXCR4</i>                  | <i>SCARNA23</i>                |                                                                                   |
| <i>miR-96</i>    | <i>miR-20b</i>                   | <i>SCARNA4</i>                 |                                                                                   |
| <i>CRTC1</i>     | <i>miR-519d</i>                  | <i>SNORA13</i>                 |                                                                                   |
| <i>miR-222</i>   | <i>miR-96</i>                    | <i>SNORA8</i>                  |                                                                                   |
| <i>miR-9</i>     | <i>miR-215</i>                   | <i>TMEM183B</i>                |                                                                                   |
| <i>miR-19b-1</i> | <i>HDAC2</i>                     | <i>HIST2H3D</i>                |                                                                                   |
| <i>STAT1</i>     | <i>DOCK4</i>                     | <i>PHLDB3</i>                  |                                                                                   |
| <i>miR-27b</i>   | <i>miR-26b</i>                   | <i>ABCA17P</i>                 |                                                                                   |
| <i>DOCK4</i>     | <i>DMXL2</i>                     | <i>LOC648570</i>               |                                                                                   |
| <i>CRX</i>       | <i>HOXA5</i>                     | <i>LOC646870</i>               |                                                                                   |
| <i>GATA2</i>     | <i>miR-106a</i>                  | <i>LOC646644</i>               |                                                                                   |
| <i>ARNT</i>      | <i>ALPK1</i>                     | <i>LOC646517</i>               |                                                                                   |
| <i>miR-519d</i>  | <i>ARNT</i>                      | <i>LOC645937</i>               |                                                                                   |
| <i>miR-192</i>   | <i>MKNK1</i>                     | <i>MAGEB17</i>                 |                                                                                   |
| <i>miR-122</i>   | <i>miR-424</i>                   | <i>LOC643733</i>               |                                                                                   |
| <i>STAT5B</i>    | <i>miR-125a</i>                  | <i>CCER2</i>                   |                                                                                   |
| <i>SOX2</i>      | <i>miR-149</i>                   | <i>SNORA4</i>                  |                                                                                   |
| <i>TFAP2C</i>    | <i>miR-7</i>                     | <i>LOC606724</i>               |                                                                                   |
| <i>miR-302d</i>  | <i>TP63</i>                      | <i>BOLA2</i>                   |                                                                                   |
| <i>miR-205</i>   | <i>SPI1</i>                      | <i>DNAJC25</i>                 |                                                                                   |
| <i>miR-373</i>   | <i>NR1H2</i>                     | <i>LRRC37A2</i>                |                                                                                   |
| <i>DMXL2</i>     | <i>ELF3</i>                      | <i>OR9K2</i>                   |                                                                                   |
| <i>miR-29b</i>   | <i>NFYA</i>                      | <i>RP9P</i>                    |                                                                                   |
| <i>BRD8</i>      | <i>EGR1</i>                      | <i>PMS2CL</i>                  |                                                                                   |
| <i>miR-25</i>    | <i>IL6</i>                       | <i>MTHFD2L</i>                 |                                                                                   |
| <i>miR-125a</i>  | <i>CIQA</i>                      | <i>LOC440895</i>               |                                                                                   |
| <i>miR-424</i>   | <i>miR-150</i>                   | <i>LINC01123</i>               |                                                                                   |
| <i>miR-26b</i>   | <i>HINFP</i>                     | <i>HIST2H2BF</i>               |                                                                                   |
| <i>miR-22</i>    | <i>E2F7</i>                      | <i>SMG1P2</i>                  |                                                                                   |
| <i>miR-146b</i>  | <i>let-7c</i>                    | <i>EIF2AK4</i>                 |                                                                                   |
| <i>FOXC1</i>     | <i>PBX2</i>                      | <i>C7orf61</i>                 |                                                                                   |
| <i>miR-204</i>   | <i>miR-373</i>                   | <i>XKRX</i>                    |                                                                                   |
| <i>NFE2L2</i>    | <i>miR-98</i>                    | <i>SRRD</i>                    |                                                                                   |
| <i>miR-23b</i>   | <i>KLF4</i>                      | <i>LOC401317</i>               |                                                                                   |
| <i>miR-130b</i>  | <i>miR-302b</i>                  | <i>FLJ46552</i>                |                                                                                   |
| <i>C9ORF84</i>   | <i>miR-25</i>                    | <i>NBPF9</i>                   |                                                                                   |
| <i>let-7c</i>    | <i>miR-19b</i>                   | <i>ZNF772</i>                  |                                                                                   |
| <i>miR-7</i>     | <i>miR-101</i>                   | <i>LOC400682</i>               |                                                                                   |
| <i>MKNK1</i>     | <i>miR-449a</i>                  | <i>C18orf49</i>                |                                                                                   |
| <i>miR-214</i>   | <i>miR-144</i>                   | <i>MED11</i>                   |                                                                                   |
| <i>miR-142</i>   | <i>miR-193b</i>                  | <i>ST20</i>                    |                                                                                   |
| <i>miR-130a</i>  | <i>miR-181a</i>                  | <i>SHC4</i>                    |                                                                                   |
| <i>ZNF721</i>    | <i>miR-372</i>                   | <i>FAM102A</i>                 |                                                                                   |
| <i>miR-15b</i>   | <i>miR-15b</i>                   | <i>ZNF805</i>                  |                                                                                   |
| <i>miR-372</i>   | <i>miR-23a</i>                   | <i>OR51I2</i>                  |                                                                                   |
| <i>miR-181a</i>  | <i>miR-205</i>                   | <i>PPIAP19</i>                 |                                                                                   |
| <i>miR-101</i>   | <i>miR-92a</i>                   | <i>FAM180A</i>                 |                                                                                   |
| <i>miR-149</i>   | <i>DA125942</i>                  | <i>TEX43</i>                   |                                                                                   |
| <i>TCF4</i>      | <i>C9ORF84</i>                   | <i>C1orf189</i>                |                                                                                   |
| <i>E2F3</i>      | <i>miR-185</i>                   | <i>GBP7</i>                    |                                                                                   |
| <i>TWIST1</i>    | <i>miR-27b</i>                   | <i>ZNF470</i>                  |                                                                                   |
| <i>miR-302a</i>  | <i>NFATC3</i>                    | <i>ZNF790</i>                  |                                                                                   |
| <i>miR-302c</i>  | <i>miR-190a</i>                  | <i>YPEL2</i>                   |                                                                                   |
| <i>miR-30b</i>   | <i>miR-506</i>                   | <i>FIBIN</i>                   |                                                                                   |
| <i>miR-30a</i>   | <i>BRD8</i>                      | <i>SLC16A12</i>                |                                                                                   |
| <i>miR-30d</i>   | <i>miR-302d</i>                  | <i>AMIGO3</i>                  |                                                                                   |
| <i>miR-29c</i>   | <i>BRCA1</i>                     | <i>RNF138P1</i>                |                                                                                   |
| <i>miR-186</i>   | <i>SP3</i>                       | <i>CA13</i>                    |                                                                                   |

| <b>5% degree</b> | <b>5% betweenness centrality</b> | <b>5% closeness centrality</b> | <b>Shared genes (5% degree-5% betweenness centrality-5% closeness centrality)</b> |
|------------------|----------------------------------|--------------------------------|-----------------------------------------------------------------------------------|
| <i>miR-125b</i>  | <i>miR-125b</i>                  | <i>RAB15</i>                   |                                                                                   |
| <i>miR-215</i>   | <i>HIPSTR</i>                    | <i>C5orf34</i>                 |                                                                                   |
| <i>LYST</i>      | <i>HPSE</i>                      | <i>C3orf62</i>                 |                                                                                   |
| <i>GATA2</i>     | <i>miR-186</i>                   | <i>RBM43</i>                   |                                                                                   |
| <i>ZEB1</i>      | <i>miR-6778</i>                  | <i>MIGA1</i>                   |                                                                                   |
| <i>AR</i>        | <i>FOXF2</i>                     | <i>SVBP</i>                    |                                                                                   |
| <i>miR-24-2</i>  | <i>CREM</i>                      | <i>ZNF773</i>                  |                                                                                   |
| <i>miR-218</i>   | <i>HOXD9</i>                     | <i>ZNF568</i>                  |                                                                                   |
| <i>FOXF2</i>     | <i>miR-137</i>                   | <i>SBSN</i>                    |                                                                                   |
| <i>ELF3</i>      | <i>STAT1</i>                     | <i>ZNF699</i>                  |                                                                                   |
| <i>PPARG</i>     | <i>miR-132</i>                   | <i>LRRC37A3</i>                |                                                                                   |
| <i>MITF</i>      | <i>FOXA1</i>                     | <i>FAM111B</i>                 |                                                                                   |
| <i>LTF</i>       | <i>miR-211</i>                   | <i>NDUFS7</i>                  |                                                                                   |
| <i>miR-320a</i>  | <i>RUNX2</i>                     | <i>CDRT1</i>                   |                                                                                   |
| <i>miR-24</i>    | <i>miR-4755</i>                  | <i>USP50</i>                   |                                                                                   |
| <i>CREM</i>      | <i>miR-218</i>                   | <i>DPPA3</i>                   |                                                                                   |
| <i>miR-190a</i>  | <i>IRF1</i>                      | <i>BMP8A</i>                   |                                                                                   |
| <i>miR-193b</i>  | <i>miR-29c</i>                   | <i>ZNF445</i>                  |                                                                                   |
| <i>CIQA</i>      | <i>miR-135b</i>                  | <i>ZNF429</i>                  |                                                                                   |
| <i>ALPK1</i>     | <i>miR-24</i>                    | <i>EP400P1</i>                 |                                                                                   |
| <i>CACYBP</i>    | <i>TFAP2C</i>                    | <i>AMIGO2</i>                  |                                                                                   |
| <i>MAX</i>       | <i>miR-423</i>                   | <i>KIF24</i>                   |                                                                                   |
| <i>miR-193a</i>  | <i>SOX2</i>                      | <i>SLC10A5</i>                 |                                                                                   |
| <i>miR-185</i>   | <i>IRF2</i>                      | <i>FAM174A</i>                 |                                                                                   |
| <i>DA125942</i>  | <i>miR-30d</i>                   | <i>LRIT3</i>                   |                                                                                   |
| <i>GBP1</i>      | <i>MYCN</i>                      | <i>ZNF774</i>                  |                                                                                   |
| <i>HP</i>        | <i>miR-337</i>                   | <i>OVCH1</i>                   |                                                                                   |
| <i>STAT5</i>     | <i>FOXL1</i>                     | <i>ZDHHC21</i>                 |                                                                                   |
| <i>miR-206</i>   | <i>CDKN1A</i>                    | <i>NRBP2</i>                   |                                                                                   |
| <i>miR-203a</i>  | <i>CAT2</i>                      | <i>TMEM173</i>                 |                                                                                   |
| <i>miR-195</i>   | <i>miR-130b</i>                  | <i>C3orf35</i>                 |                                                                                   |
| <i>let-7e</i>    | <i>ZNF721</i>                    | <i>LOC339803</i>               |                                                                                   |
| <i>miR-107</i>   | <i>miR-4768</i>                  | <i>SPOPL</i>                   |                                                                                   |
| <i>miR-8485</i>  | <i>lincIRX5</i>                  | <i>ZNF260</i>                  |                                                                                   |
| <i>PITX1</i>     | <i>miR-342</i>                   | <i>METTL2A</i>                 |                                                                                   |
| <i>miR-34c</i>   | <i>miR-183</i>                   | <i>RAB43</i>                   |                                                                                   |
| <i>miR-5011</i>  | <i>miR-503</i>                   | <i>CHSY3</i>                   |                                                                                   |
| <i>miR-4755</i>  | <i>miR-32</i>                    | <i>HIST2H2AB</i>               |                                                                                   |
| <i>miR-211</i>   | <i>miR-140</i>                   | <i>TRIM59</i>                  |                                                                                   |
| <i>miR-98</i>    | <i>miR-4722</i>                  | <i>ATP11C</i>                  |                                                                                   |
| <i>MEF2A</i>     | <i>miR-30a</i>                   | <i>FOXD4L3</i>                 |                                                                                   |
| <i>CEBPA</i>     | <i>miR-615</i>                   | <i>C9orf47</i>                 |                                                                                   |
| <i>miR-29b-1</i> | <i>miR-320a</i>                  | <i>LOC286161</i>               |                                                                                   |



**Supplementary Table 4.** Results of topological analysis of downregulated genes in GRN and shared genes

| <b>5% degree</b> | <b>5% betweenness centrality</b> | <b>5% closeness centrality</b> | <b>Shared genes (5% degree-5%betweenness centrality-5% closeness centrality)</b> |
|------------------|----------------------------------|--------------------------------|----------------------------------------------------------------------------------|
| <i>NFIC</i>      | <i>NFIC</i>                      | <i>miR-17</i>                  | <i>miR-21</i>                                                                    |
| <i>GATA6</i>     | <i>GATA6</i>                     | <i>miR-20a</i>                 | <i>YY1</i>                                                                       |
| <i>TP53</i>      | <i>TP53</i>                      | <i>miR-93</i>                  | <i>FOXC1</i>                                                                     |
| <i>MYC</i>       | <i>ZNF652</i>                    | <i>miR-155</i>                 | <i>FOS</i>                                                                       |
| <i>YY1</i>       | <i>YY1</i>                       | <i>miR-18a</i>                 | <i>KLF13</i>                                                                     |
| <i>ZNF652</i>    | <i>RORA</i>                      | <i>miR-106b</i>                | <i>miR-92a</i>                                                                   |
| <i>SP1</i>       | <i>SP1</i>                       | <i>miR-124</i>                 | <i>miR-20a</i>                                                                   |
| <i>HMGA1</i>     | <i>MYC</i>                       | <i>miR-106a</i>                | <i>miR-155</i>                                                                   |
| <i>ZBTB7A</i>    | <i>ZBTB7A</i>                    | <i>miR-519d</i>                | <i>SPIB</i>                                                                      |
| <i>RORA</i>      | <i>HMGA1</i>                     | <i>MYC</i>                     | <i>UBTF</i>                                                                      |
| <i>REL</i>       | <i>REL</i>                       | <i>miR-20b</i>                 | <i>miR-145</i>                                                                   |
| <i>POU2F1</i>    | <i>SYNCRIP</i>                   | <i>miR-16</i>                  | <i>MAPK14</i>                                                                    |
| <i>HIF1A</i>     | <i>POU2F1</i>                    | <i>TP53</i>                    | <i>TP53</i>                                                                      |
| <i>STAT3</i>     | <i>HIF1A</i>                     | <i>SP1</i>                     | <i>miR-34a</i>                                                                   |
| <i>SYNCRIP</i>   | <i>PTGS2</i>                     | <i>NFIC</i>                    | <i>REL</i>                                                                       |
| <i>CREB1</i>     | <i>miR-155</i>                   | <i>let-7b</i>                  | <i>FOXO3</i>                                                                     |
| <i>ACTR2</i>     | <i>STAT3</i>                     | <i>miR-186</i>                 | <i>miR-19a</i>                                                                   |
| <i>KLF13</i>     | <i>KLF13</i>                     | <i>GATA6</i>                   | <i>miR-93</i>                                                                    |
| <i>FOXC1</i>     | <i>ACTR2</i>                     | <i>miR-101</i>                 | <i>EP300</i>                                                                     |
| <i>SMAD4</i>     | <i>ELK4</i>                      | <i>miR-19a</i>                 | <i>POU2F1</i>                                                                    |
| <i>ELK4</i>      | <i>miR-21</i>                    | <i>miR-98</i>                  | <i>SMAD4</i>                                                                     |
| <i>E2F1</i>      | <i>FOXC1</i>                     | <i>STAT3</i>                   | <i>SYNCRIP</i>                                                                   |
| <i>NR3C1</i>     | <i>ARL4C</i>                     | <i>ZNF652</i>                  | <i>TGFBR3</i>                                                                    |
| <i>ESR1</i>      | <i>TGFBR3</i>                    | <i>YY1</i>                     | <i>CEBPB</i>                                                                     |
| <i>SRF</i>       | <i>KLRD1</i>                     | <i>HIF1A</i>                   | <i>RICTOR</i>                                                                    |
| <i>TGFBR3</i>    | <i>NR3C1</i>                     | <i>miR-21</i>                  | <i>HMGA1</i>                                                                     |
| <i>SPIB</i>      | <i>SLC25A36</i>                  | <i>REL</i>                     | <i>NFIC</i>                                                                      |
| <i>MAPK14</i>    | <i>CREB1</i>                     | <i>RORA</i>                    | <i>MYC</i>                                                                       |
| <i>RELA</i>      | <i>RELA</i>                      | <i>miR-15a</i>                 | <i>miR-124</i>                                                                   |
| <i>ZFH3</i>      | <i>MAPK14</i>                    | <i>RELA</i>                    | <i>JUN</i>                                                                       |
| <i>PURA</i>      | <i>SMAD4</i>                     | <i>miR-92a</i>                 | <i>USP28</i>                                                                     |
| <i>ARL4C</i>     | <i>miR-17</i>                    | <i>POU2F1</i>                  | <i>E2F1</i>                                                                      |
| <i>SLC25A36</i>  | <i>REPIN1</i>                    | <i>CREB1</i>                   | <i>RORA</i>                                                                      |
| <i>RUNX1</i>     | <i>SRF</i>                       | <i>ZBTB7A</i>                  | <i>TCF7L2</i>                                                                    |
| <i>KLRD1</i>     | <i>ZNF281</i>                    | <i>HMGA1</i>                   | <i>CXCL5</i>                                                                     |
| <i>UBTF</i>      | <i>miR-20a</i>                   | <i>miR-526b</i>                | <i>miR-18a</i>                                                                   |
| <i>TMEM106B</i>  | <i>TMEM106B</i>                  | <i>SMAD4</i>                   | <i>ETS1</i>                                                                      |
| <i>ZNF281</i>    | <i>RBPJ</i>                      | <i>miR-190a</i>                | <i>ARL4C</i>                                                                     |
| <i>MYCN</i>      | <i>SPIB</i>                      | <i>miR-15b</i>                 | <i>MYCN</i>                                                                      |
| <i>RBPJ</i>      | <i>ZFH3</i>                      | <i>ACTR2</i>                   | <i>STAT3</i>                                                                     |
| <i>miR-155</i>   | <i>PXK</i>                       | <i>ETS1</i>                    | <i>HNF4A</i>                                                                     |
| <i>E2F6</i>      | <i>MYCN</i>                      | <i>E2F1</i>                    | <i>RELA</i>                                                                      |
| <i>STYX</i>      | <i>miR-93</i>                    | <i>TGFBR3</i>                  | <i>HIF1A</i>                                                                     |
| <i>CXCL5</i>     | <i>ELK1</i>                      | <i>miR-192</i>                 | <i>FAM104A</i>                                                                   |
| <i>TCF7L2</i>    | <i>E2F6</i>                      | <i>NFKB1</i>                   | <i>ZFH3</i>                                                                      |
| <i>AHR</i>       | <i>STYX</i>                      | <i>miR-5011</i>                | <i>SRF</i>                                                                       |
| <i>ATM</i>       | <i>E2F1</i>                      | <i>let-7a</i>                  | <i>miR-106b</i>                                                                  |
| <i>PTGS2</i>     | <i>CXCL5</i>                     | <i>ESR1</i>                    | <i>TMEM106B</i>                                                                  |
| <i>WT1</i>       | <i>RUNX1</i>                     | <i>FOXO3</i>                   | <i>RUNX1</i>                                                                     |
| <i>FAM104A</i>   | <i>PURA</i>                      | <i>miR-8485</i>                | <i>PTGS2</i>                                                                     |
| <i>TFAP2A</i>    | <i>UBTF</i>                      | <i>miR-218</i>                 | <i>CTNNB1</i>                                                                    |
| <i>NFKB1</i>     | <i>miR-124</i>                   | <i>miR-125a</i>                | <i>miR-221</i>                                                                   |
| <i>ETS1</i>      | <i>ESR1</i>                      | <i>miR-221</i>                 | <i>miR-17</i>                                                                    |
| <i>REPIN1</i>    | <i>TCF7L2</i>                    | <i>miR-183</i>                 | <i>NFKB1</i>                                                                     |
| <i>miR-21</i>    | <i>ETS1</i>                      | <i>miR-25</i>                  | <i>ELK4</i>                                                                      |
| <i>FOXO3</i>     | <i>miR-200c</i>                  | <i>SRF</i>                     | <i>SP1</i>                                                                       |
| <i>ZBTB38</i>    | <i>TFAP2A</i>                    | <i>SYNCRIP</i>                 | <i>ZBTB38</i>                                                                    |
| <i>CEBPB</i>     | <i>ZBTB38</i>                    | <i>NR3C1</i>                   | <i>AHR</i>                                                                       |
| <i>miR-17</i>    | <i>miR-18a</i>                   | <i>miR-145</i>                 | <i>SLC25A36</i>                                                                  |
| <i>miR-20a</i>   | <i>let-7b</i>                    | <i>ELK4</i>                    | <i>RBPJ</i>                                                                      |
| <i>ELK1</i>      | <i>miR-145</i>                   | <i>RBPJ</i>                    | <i>ACTR2</i>                                                                     |
| <i>HNF4A</i>     | <i>FOXC1</i>                     | <i>MAPK14</i>                  | <i>ZNF652</i>                                                                    |

| <b>5% degree</b> | <b>5% betweenness centrality</b> | <b>5% closeness centrality</b> | <b>Shared genes (5% degree-5%betweenness centrality-5% closeness centrality)</b> |
|------------------|----------------------------------|--------------------------------|----------------------------------------------------------------------------------|
| <i>RICTOR</i>    | <i>RICTOR</i>                    | <i>miR-26b</i>                 | <i>GATA6</i>                                                                     |
| <i>JUN</i>       | <i>USP28</i>                     | <i>FOXC1</i>                   | <i>miR-27a</i>                                                                   |
| <i>STAT2</i>     | <i>THRB</i>                      | <i>SPIB</i>                    | <i>NR3C1</i>                                                                     |
| <i>HNRNPR</i>    | <i>HNRNPR</i>                    | <i>MYCN</i>                    | <i>ZBTB7A</i>                                                                    |
| <i>FOS</i>       | <i>ATM</i>                       | <i>RUNX1</i>                   | <i>PURA</i>                                                                      |
| <i>PXK</i>       | <i>miR-221</i>                   | <i>PURA</i>                    | <i>ATM</i>                                                                       |
| <i>MAX</i>       | <i>miR-122</i>                   | <i>miR-373</i>                 | <i>ESR1</i>                                                                      |
| <i>USP28</i>     | <i>FAM104A</i>                   | <i>miR-34a</i>                 | <i>CREB1</i>                                                                     |
| <i>miR-200c</i>  | <i>FOXO3</i>                     | <i>TCF7L2</i>                  |                                                                                  |
| <i>SREBF1</i>    | <i>FOS</i>                       | <i>JUN</i>                     |                                                                                  |
| <i>CTNNB1</i>    | <i>WT1</i>                       | <i>TMEM106B</i>                |                                                                                  |
| <i>EP300</i>     | <i>miR-141</i>                   | <i>CEBPB</i>                   |                                                                                  |
| <i>PPARA</i>     | <i>miR-106b</i>                  | <i>miR-27a</i>                 |                                                                                  |
| <i>miR-19a</i>   | <i>CEBPB</i>                     | <i>miR-1277</i>                |                                                                                  |
| <i>APEX1</i>     | <i>AHR</i>                       | <i>EP300</i>                   |                                                                                  |
| <i>FBXO9</i>     | <i>miR-101</i>                   | <i>PPARA</i>                   |                                                                                  |
| <i>miR-93</i>    | <i>miR-143</i>                   | <i>KLF4</i>                    |                                                                                  |
| <i>TEAD1</i>     | <i>HNF4A</i>                     | <i>miR-548ah</i>               |                                                                                  |
| <i>PSMF1</i>     | <i>JUN</i>                       | <i>miR-215</i>                 |                                                                                  |
| <i>miR-18a</i>   | <i>miR-16</i>                    | <i>miR-195</i>                 |                                                                                  |
| <i>ZNF148</i>    | <i>MTF1</i>                      | <i>miR-143</i>                 |                                                                                  |
| <i>THRB</i>      | <i>miR-26b</i>                   | <i>miR-497</i>                 |                                                                                  |
| <i>SYTL2</i>     | <i>miR-27a</i>                   | <i>RICTOR</i>                  |                                                                                  |
| <i>miR-200b</i>  | <i>NFKB1</i>                     | <i>FOS</i>                     |                                                                                  |
| <i>miR-34a</i>   | <i>FBXO9</i>                     | <i>SLC25A36</i>                |                                                                                  |
| <i>miR-27a</i>   | <i>STAT2</i>                     | <i>FOXC1</i>                   |                                                                                  |
| <i>KLF12</i>     | <i>miR-223</i>                   | <i>miR-185</i>                 |                                                                                  |
| <i>SNAI2</i>     | <i>PSMF1</i>                     | <i>FAM104A</i>                 |                                                                                  |
| <i>FGFR1OP2</i>  | <i>MAX</i>                       | <i>CTNNB1</i>                  |                                                                                  |
| <i>NR1H2</i>     | <i>miR-19a</i>                   | <i>ARLAC</i>                   |                                                                                  |
| <i>MTF1</i>      | <i>miR-31</i>                    | <i>miR-19b</i>                 |                                                                                  |
| <i>POU2F2</i>    | <i>miR-9</i>                     | <i>miR-363</i>                 |                                                                                  |
| <i>miR-200a</i>  | <i>EP300</i>                     | <i>HNF4A</i>                   |                                                                                  |
| <i>miR-145</i>   | <i>miR-106a</i>                  | <i>miR-31</i>                  |                                                                                  |
| <i>CREBBP</i>    | <i>ZNF148</i>                    | <i>PTGS2</i>                   |                                                                                  |
| <i>P2RY10</i>    | <i>CTNNB1</i>                    | <i>ZBTB38</i>                  |                                                                                  |
| <i>miR-124</i>   | <i>RAD21</i>                     | <i>miR-204</i>                 |                                                                                  |
| <i>EGR1</i>      | <i>miR-186</i>                   | <i>miR-32</i>                  |                                                                                  |
| <i>miR-141</i>   | <i>FGFR1OP2</i>                  | <i>miR-372</i>                 |                                                                                  |
| <i>ZBTB16</i>    | <i>CREBBP</i>                    | <i>miR-130b</i>                |                                                                                  |
| <i>RARA</i>      | <i>miR-29a</i>                   | <i>SNAI2</i>                   |                                                                                  |
| <i>TCF3</i>      | <i>miR-146a</i>                  | <i>USP28</i>                   |                                                                                  |
| <i>miR-106b</i>  | <i>miR-34a</i>                   | <i>AHR</i>                     |                                                                                  |
| <i>SREBF2</i>    | <i>KLF12</i>                     | <i>miR-128</i>                 |                                                                                  |
| <i>RAD21</i>     | <i>miR-92a</i>                   | <i>CXCL5</i>                   |                                                                                  |
| <i>HINFP</i>     | <i>PCBP1</i>                     | <i>SMAD3</i>                   |                                                                                  |
| <i>miR-221</i>   | <i>miR-20b</i>                   | <i>ZFH3</i>                    |                                                                                  |
| <i>JAZF1</i>     | <i>miR-98</i>                    | <i>KLF13</i>                   |                                                                                  |
| <i>HOPX</i>      | <i>miR-519d</i>                  | <i>miR-223</i>                 |                                                                                  |
| <i>IL2RB</i>     | <i>let-7a</i>                    | <i>ATM</i>                     |                                                                                  |
| <i>miR-92a</i>   | <i>HOPX</i>                      | <i>UBTF</i>                    |                                                                                  |
